# Supplementary material for: Selective trapping of CO2 gas and cage occupancy in CO2–N2 and CO2–CO mixed gas hydrates
Source: Royal Society of Chemistry journal article supplement (doi:10.1039/c8cc00538a), 2018-01-01
Supplement: c8cc00538a1.pdf [file c8cc00538a1.pdf]

## **Selective trapping of CO<sub>2</sub> gas and cage occupancy in CO<sub>2</sub>-N<sub>2</sub> and CO<sub>2</sub>-CO mixed gas hydrates.**

Claire Petuya<sup>a</sup>, Françoise Damay<sup>b</sup>, Sarah Desplanche<sup>a</sup>, David Talaga<sup>a</sup>, Arnaud Desmedt<sup>b</sup>

<sup>a</sup>Institut des Sciences Moléculaire, UMR 5222 CNRS, Univ. Bordeaux, 351 cours de la Libération F 33404 Talence Cedex, France.

<sup>b</sup>Laboratoire Léon Brillouin, UMR 12 CEA-CNRS, Bât. 563 CEA Saclays, 91191 Gif-sur-Yvette Cedex, France.

### **\*Corresponding Author**

Email: arnaud.desmedt@u-bordeaux.fr

### **Table of contents**

*Samples preparation*

*Neutron Diffraction*

*Raman spectra*

*References*

## Samples preparation

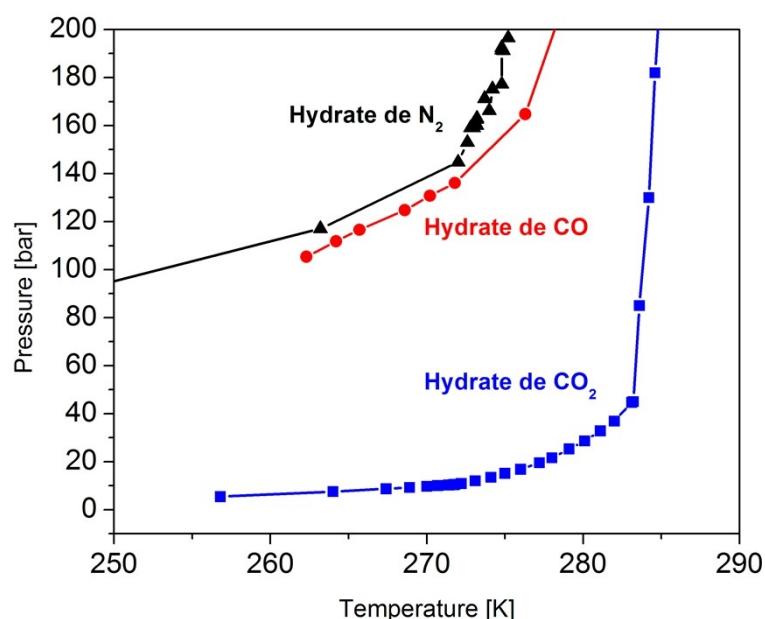

**Figure S1:** Phase diagram of pure CO, CO<sub>2</sub> and N<sub>2</sub> hydrates.<sup>1-9</sup>

For neutron diffraction experiments, the sample was formed using a powder (grain size typically of the order of 100-200  $\mu\text{m}$ ) of deuterium oxide ice (99.9 % D) and applying a gas pressure (purity > 99.997%) of 20 bar of CO<sub>2</sub>, CO<sub>2</sub>-CO or CO<sub>2</sub>-N<sub>2</sub> during 3 days. The initial gas mixture compositions were 25 %, 50 % and 80 % of CO<sub>2</sub> in CO<sub>2</sub>-N<sub>2</sub> hydrate and 25 %, 50 % and 75 % of CO<sub>2</sub> in CO<sub>2</sub>-CO hydrate. The sample pressures were controlled by a PM High Pressure pump (Top Industrie, Vaux-le-Penil, France) which can contain 100 cm<sup>3</sup> of gas up to 500 bars. The cell temperature was maintained at 260 K ( $\pm 5$  K) with a thermal bath, to ensure the formation within the thermodynamic stability region (Figure S1). For *in situ* Raman microspectroscopy, Milli-Q water was injected inside the optical cell and the temperature was controlled by using a modified temperature stage (Linkam Scientific Instruments Ltd., UK). First, the hexagonal ice has been formed at *ca.* 240K and then the temperature was raised to 270 K ( $\pm 0.1$  K). Finally, 25 bar of CO-CO<sub>2</sub> or CO<sub>2</sub>-N<sub>2</sub> gas mixture was applied with the high pressure pump on the formed hexagonal ice. The initial gas mixture compositions were 25 %, 50 % and 80 % of CO<sub>2</sub> in CO<sub>2</sub>-N<sub>2</sub> hydrate and 30 %, 40%, 50 %, 65% and 75 % of CO<sub>2</sub> in CO<sub>2</sub>-CO hydrate. In addition, one sample consisting of 90 % of CO and 10 % of CO<sub>2</sub> have been prepared from liquid water at 25 bar. Then, the sample was cooled until 245 K ( $\pm 0.1$  K) and finally, the temperature was maintained at 270 K ( $\pm 0.1$  K).

Gas mixtures were done using pure gas of CO, CO<sub>2</sub> and N<sub>2</sub> (purity > 99.997%) and two syringe pumps. Each volume and pressure is measured helping with PM HP pump and the second pump is used to store the first gas used for the mixture. Successive pressurization/depressurization were applied for homogenizing the gas mixtures. Calibration curves have been done to correlate the evolution of the Raman intensity  $I_{\text{CO}_2}/I_{\text{N}_2}$  and  $I_{\text{CO}_2}/I_{\text{CO}}$  ratio with the initial gas concentration of the mixtures  $[\text{CO}_2]/[\text{N}_2]$  and  $[\text{CO}_2]/[\text{CO}]$ , respectively (Figure 3).

### Neutron diffraction

---

The experiments have been performed at Laboratoire Léon Brillouin (CEA-Saclay) using the cold neutron two-axis powder diffractometer G 4-1. Measurements were done with a wavelength of 2.428 Å. Due to a better instrumental resolution at low scattering angle  $2\theta$ , the angular range  $2\theta < 60^\circ$  has been considered. The samples have been cold transferred into the cryostat. The pattern-matching of the powder diffractogram has been performed with the Le Bail algorithm<sup>10</sup> and the FullProf program from the FullProf suite<sup>11</sup>.

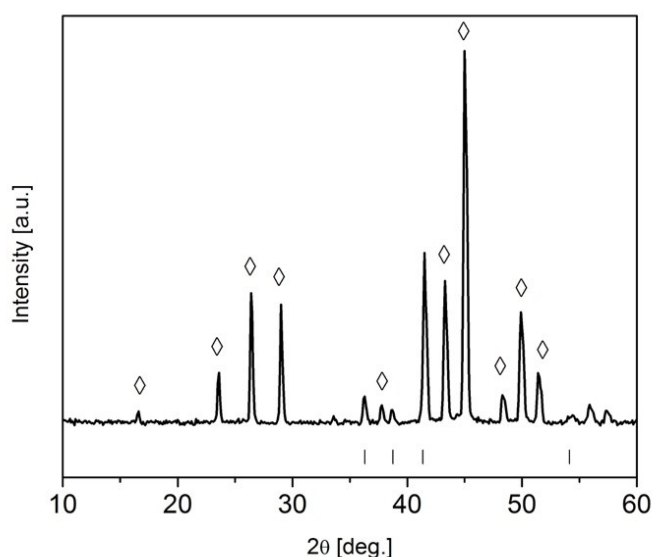

**Figure S2:** Neutron diffractogram (100 K and 1 bar) of the carbon dioxide hydrate formed for 3 days at 25 bar and 255K. The vertical lines and the diamonds represent the Bragg peaks of the Ih ice (blue) and SI hydrate, respectively.

Mixed CO<sub>2</sub>-N<sub>2</sub> and CO<sub>2</sub>-CO hydrates have been prepared with various gas mixtures compositions and stored at liquid nitrogen temperature. Diffractograms have been recorded

after various duration of cold storage to probe the time evolution of the formed CO<sub>2</sub>-CO hydrates. As shown in Fig. S3, the formed mixed hydrates are all of type SI (except for the gas mixture CO<sub>2</sub>-CO of 25/75, no hydrate is formed; see manuscript for details) and no time evolution is observed whatever the mixed hydrate is.

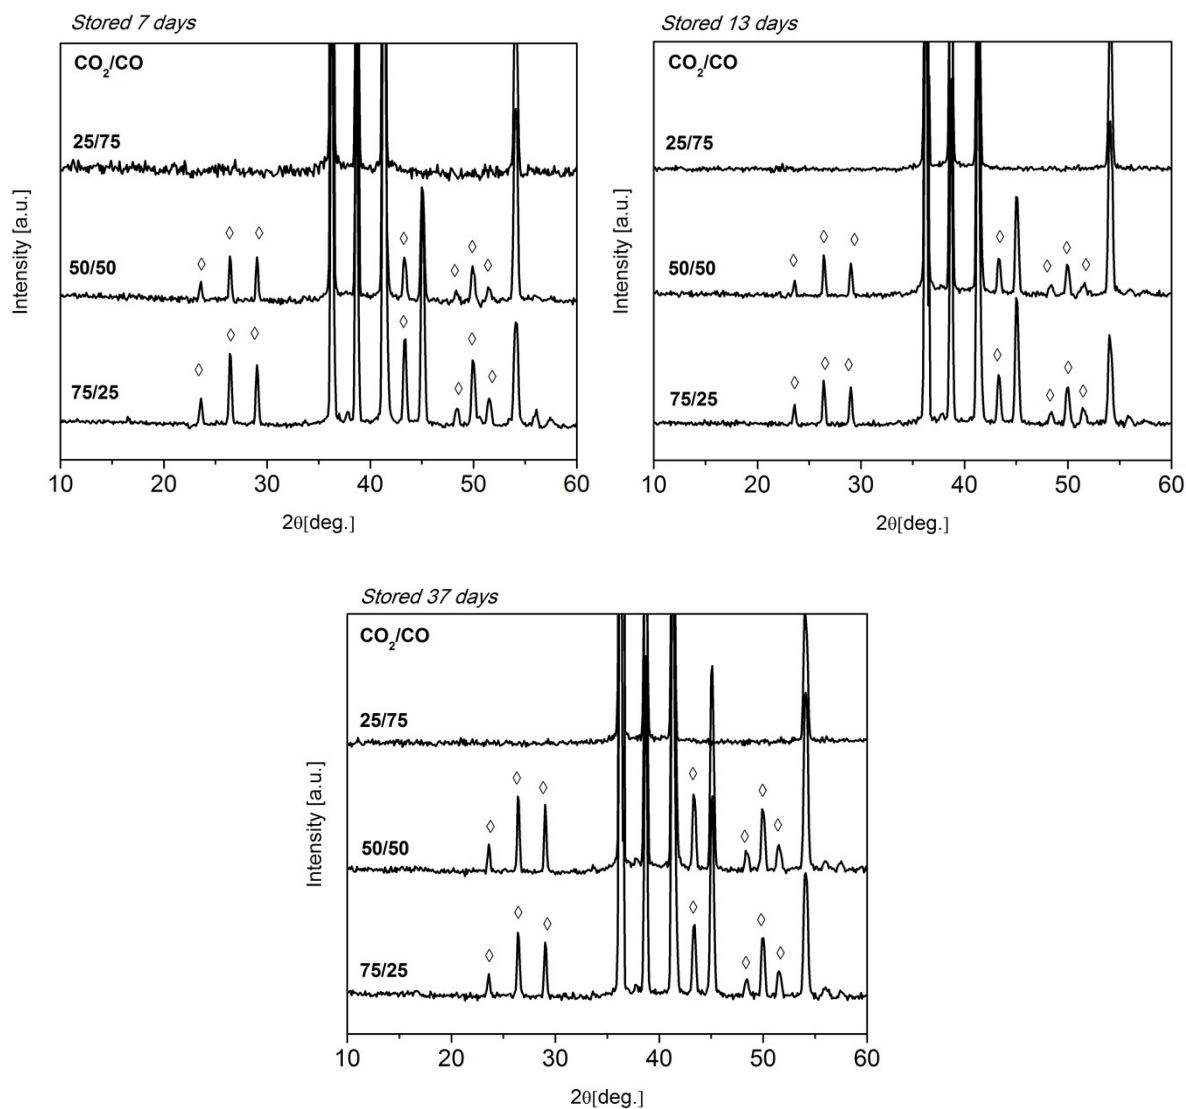

**Figure S3:** Neutron diffractogram (100 K and 1 bar) of the mixed CO<sub>2</sub>-CO hydrate formed for 3 days at 25 bar and 260 K and for various storing time in liquid nitrogen as indicated on the figure. Diamonds represent the Bragg peaks of the SI structure. The gas mixture composition used to form the mixed hydrate from ice is indicated on the figure. No SII Bragg peaks are observed, so that the formed SI structures are thermodynamically stable whatever the gas composition is.

## Raman spectra

The spectra were recorded with a Labram HR microspectrometer (Horiba Jobin Yvon, Villeneuve d'Ascq, France) using a 514 nm wavelength laser as excitation source. A 50X objective permitted us to focus the incident laser beam and to collect the Raman scattering. The Raman scattering was dispersed by a holographic grating of 2400 lines/mm (high resolution) and analysed by a Peltier-cooled CCD detector (Andor, Belfast, UK). Thus, the intensity of different wavelengths of the spectrum can be measured with a spectral resolution of  $0.8 \text{ cm}^{-1}$  (Full Width at Half-Maximum). The wavenumber calibration of the spectrometer was done using the  $520.7 \text{ cm}^{-1}$  mode of a silicon sample and the neon source excitation at  $2348.4 \text{ cm}^{-1}$ . For the *in-situ* experiments, the sample temperatures were maintained at the desired value ( $\pm 0.1 \text{ K}$ ) during the acquisition by using a lab-modified temperature controlled stage (Linkam Scientific Instruments Ltd., UK), including a home-made high-pressure optical cell equipped with a 2 mm thick sapphire optical window. The sample pressures were controlled by the PM High Pressure pump. All spectra were collected for typically 30 min.

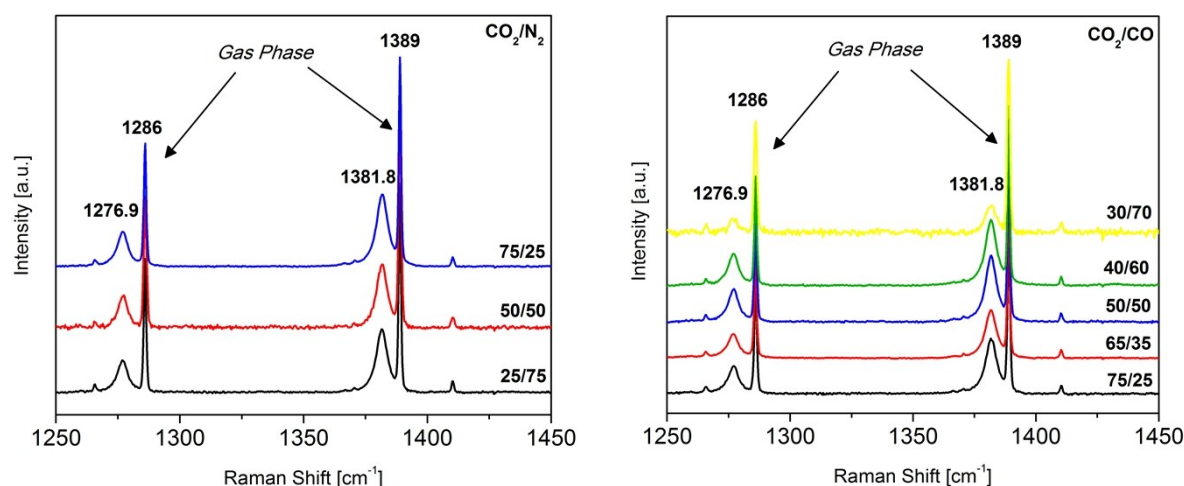

**Figure S4:** Raman signatures of the Fermi resonance of  $\text{CO}_2$  in gas phase and hydrate phase in  $\text{CO}_2\text{-N}_2$  (left) and  $\text{CO-CO}_2$  (right) hydrates.

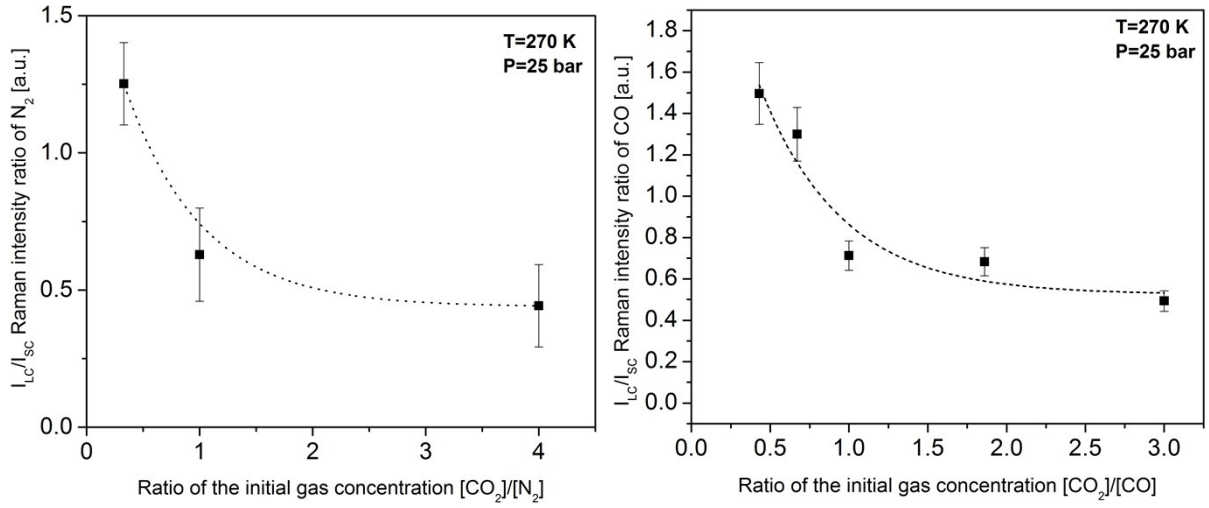

**Figure S5:** Evolution of the cage occupancy  $I_{LC}/I_{SC}$  ratio with the initial gas concentration for  $\text{CO}_2\text{-N}_2$  mixed hydrate (left hand) and  $\text{CO}_2\text{-CO}$  mixed hydrate (right hand). The dotted lines are guides to the eyes obtained with simple exponential decaying functions.

The occupancy of the cage can be estimated on the basis of the ratio  $I(v_1)/I(v_2) = I_{LC}/I_{SC}$ , which can be expressed as:

$$\frac{I_{LC}}{I_{SC}} = \frac{n_{LC}\theta_{LC}}{n_{SC}\theta_{SC}} \left( \frac{\alpha_{LC}}{\alpha_{SC}} \right)^2 \quad (1)$$

where  $\theta_{LC}$  and  $\theta_{SC}$  are the occupancy in LC and in SC, respectively.  $n_{LC}$  and  $n_{SC}$  are the number of LC and SC in the hydrate structure, respectively. The scattering cross sections (i.e. the polarisability variation due to the stretching mode) of nitrogen or carbon monoxide in LC and in SC ( $\alpha_{LC}$  and  $\alpha_{SC}$ , respectively) are assumed to be similar. Such an assumption has been validated in the isosteric SI carbon monoxide hydrate<sup>12</sup> or in the SI methane hydrate.<sup>13,14</sup>

Thus, in the SI structure, the ratio is simply given by:

$$\frac{I_{LC}}{I_{SC}} = \frac{3\theta_{LC}}{\theta_{SC}} \quad (2)$$

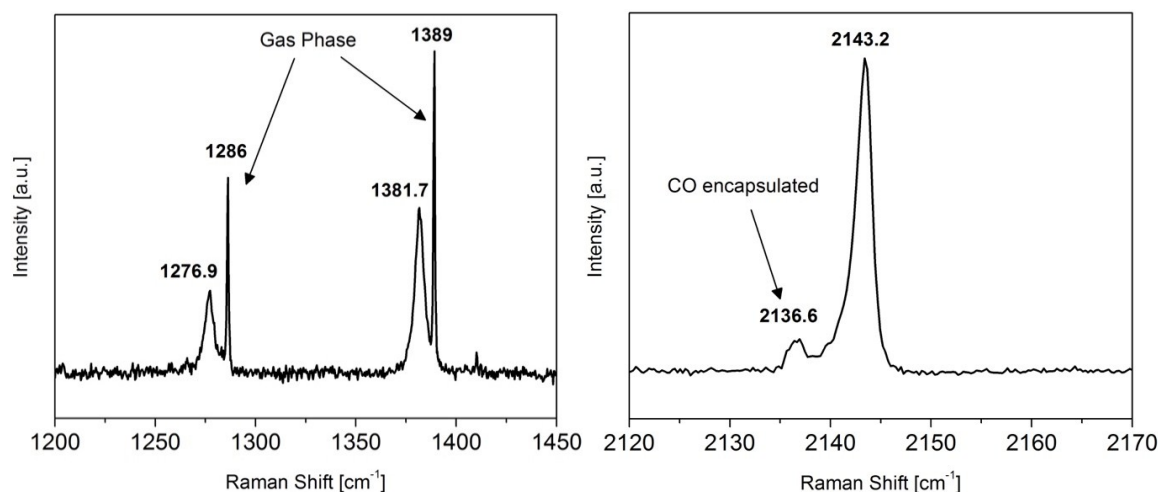

**Figure S6:** Raman signatures of the CO<sub>2</sub> Fermi resonance (left) and of the CO stretching mode (right) in the CO-CO<sub>2</sub> (90/10) gas mixture and in the CO-CO<sub>2</sub> mixed hydrate formed from liquid water pressurized at 25 bar and cooled at 270K.

## References

- (1) Van Cleeff, A.; Diepen, G. A. M. Gas Hydrates of Nitrogen and Oxygen. *Recueil* **1960**, 79, 582-586.
- (2) Marshall, D. R.; Saito, S.; Kobayashi, R. Hydrates at high pressures: Part I. Methane-water, argon-water, and nitrogen-water systems. *AIChE J.* **1964**, 10, 202-205.
- (3) Jhaveri, J.; Robinson, D.B.; Hydrates in the methane-nitrogen system. *Can. J. Chem. Eng.* **1965**, 43, 75-78.
- (4) Sugahara, K.; Tanaka, Y.; Sugahara, T.; Ohgaki, K. Thermodynamic stability and structure of nitrogen hydrate crystal. *J. Supramol. Chem.* **2002**, 2, 365-368.
- (5) Yoon, J.-H.; Kawamura, T.; Ohtake, M.; Takeya, S.; Komai, T.; Yamamoto, Y.; Emi, H.; Kohara, M.; Tanaka, S.; Takano, O.; Uchida, K. Highly selective encaging of carbon dioxide molecules in the mixed carbon dioxide and nitrogen hydrate at low temperatures. *J. Phys. Chem. B* **2006**, 110, 17595-17599.
- (6) Mohammadi, A. H.; Anderson, R.; Tohidi, B. Carbon monoxide clathrate hydrates: equilibrium data and thermodynamic modeling. *AIChE Journal* **2005**, 51, 2825-2833.
- (7) Mohammadi, A. H.; Richon, D. Equilibrium data of nitrous oxide and carbon dioxide clathrate hydrates. *J. Chem. Eng. Data* **2009**, 54, 279-281.

- (8) Mohammadi, A. H.; Richon, D. Ice-clathrate hydrate-gas phase equilibria for air, oxygen, nitrogen, carbon monoxide, methane or ethane+water system. *Ind. Eng. Chem. Res.* **2010**, *49*, 3976-3979.
- (9) Sloan, E. D.; Koh, C. A. *Clathrate Hydrates of Natural Gases*; CRC Press: Boca Raton, FL 2008.
- (10) Le Bail, A. *Accuracy in Powder Diffraction II: Proceedings of the International Conference May 26-29* edited by E. Prince & JK Stalick. NIST Special Publication, **1992**, 846, 142-153.
- (11) Rodriguez-Carvajal, J. FULLPROF: a program for Rietveld refinement and pattern matching analysis. In *satellite meeting on powder diffraction of the XV congress of the IUCr* Toulouse (France), **1990**, 127.
- (12) Petuya, C.; Damay, F.; Talaga, D.; Desmedt, A. Guest Partitioning in Carbon Monoxide Hydrate by Raman Spectroscopy. *J. Phys. Chem. C* **2017**, *121*(25), 13798–13802.
- (13) Sum, A. K.; Buruss, R. C.; Sloan, E. D. Measurement of Clathrate Hydrates via Raman Spectroscopy. *J. Phys. Chem. B* **1997**, *101*, 7371-7377.
- (14) Qin, J.; Kuhs, W. F. Quantitative Analysis of Gas Hydrates Using Raman Spectroscopy. *AIChE Journal* **2013**, *59*, 2155-2167.
